# Supplementary material for: Information and complexity measures in molecular reactivity studies
Source: Royal Society of Chemistry journal article supplement (doi:10.1039/c4cp01729c), 2014-01-01
Supplement: c4cp01729c2.pdf [file c4cp01729c2.pdf]

# Supporting Information for Information and complexity measures in the molecular reactivity studies.

*Meressa A. Welearegay, Robert Balawender,\* Andrzej Holas*

Institute of Physical Chemistry, Polish Academy of Sciences,  
Kasprzaka 44/52, PL-01-224 Warsaw, Poland

Supporting Information includes

Interactive file with plots. You need Wolfram CDF player to see these plots. It is available free of charge via the Internet at <http://www.wolfram.com/cdf-player/>
